# Supplementary material
Source: PubMed Central journal article supplement (PMC4663098)

3 Weeks

Coronal

Apical

SCX/NG2/DAPI

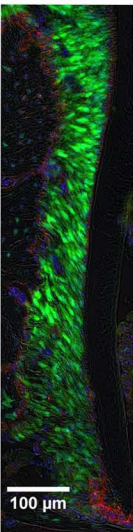

SCX

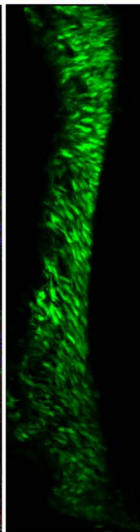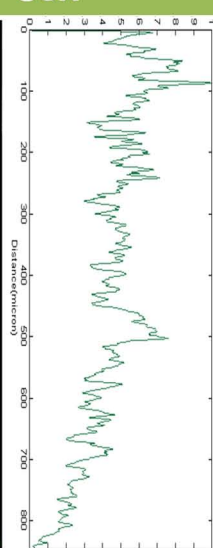

NG2 at C-PDL

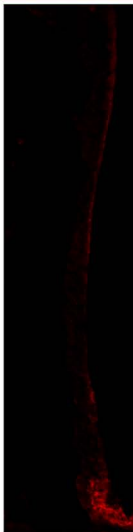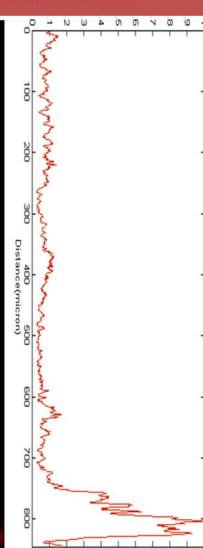

NG2 at B-PDL

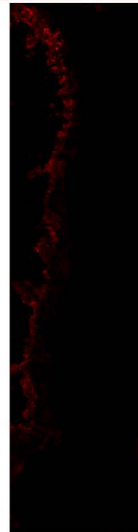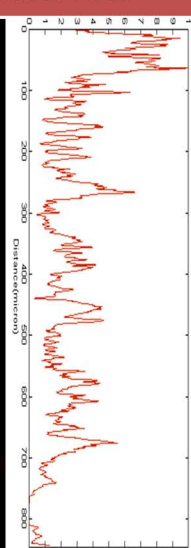

3 Months

Coronal

Apical

SCX/NG2/DAPI

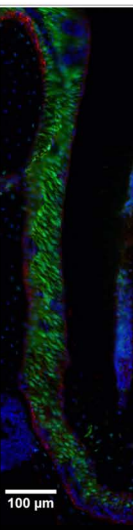

SCX

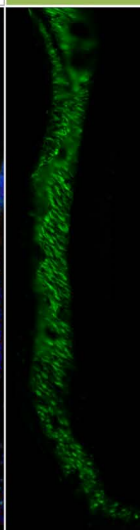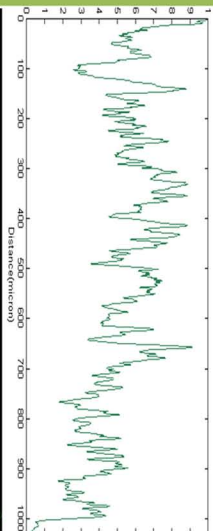

NG2 at C-PDL

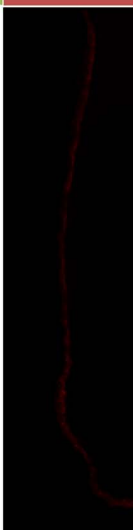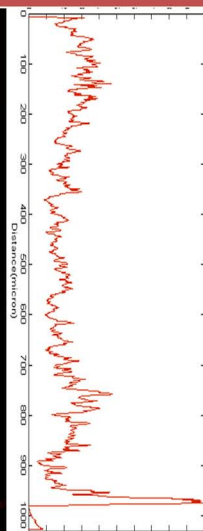

NG2 at B-PDL

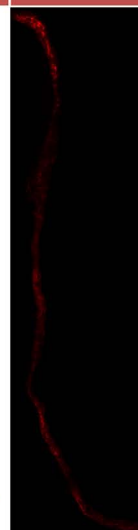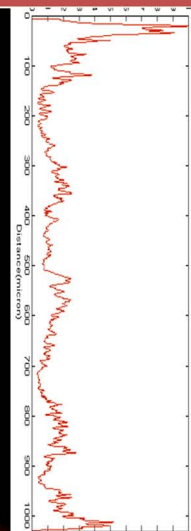

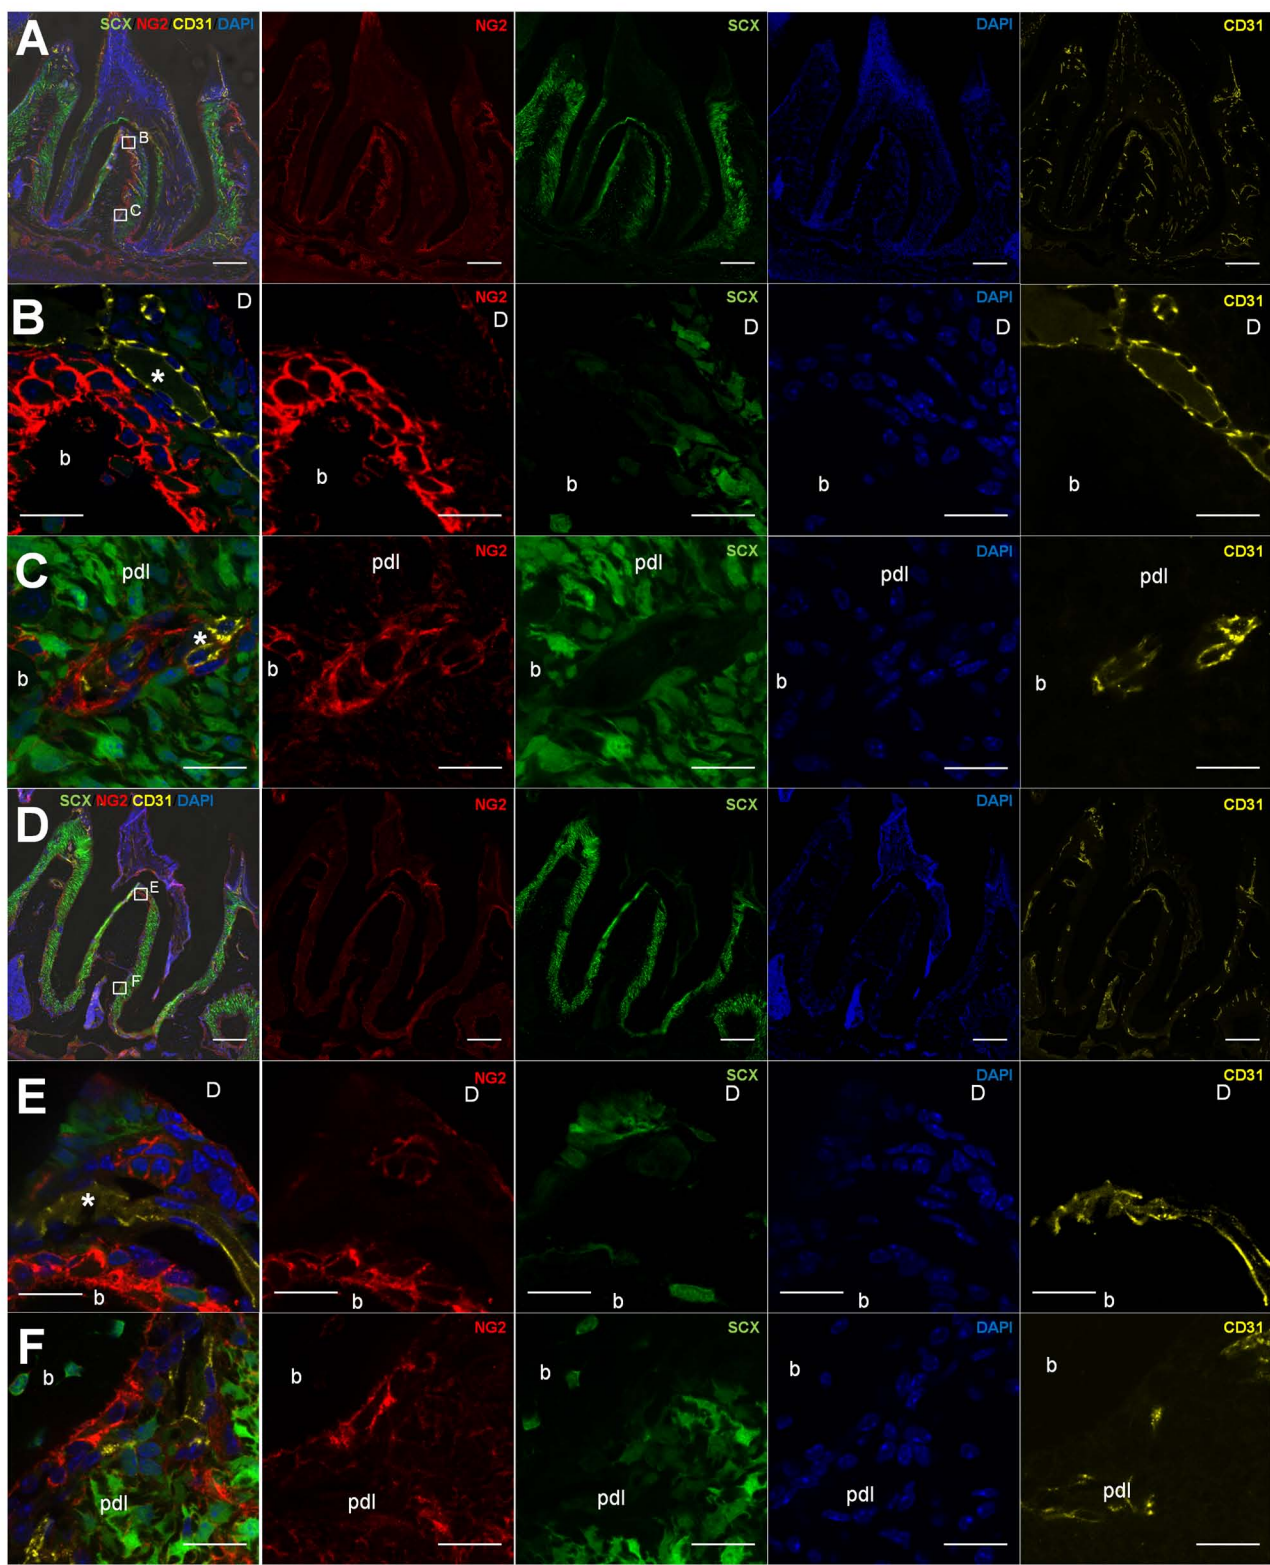



NG2/SCX/DAPI

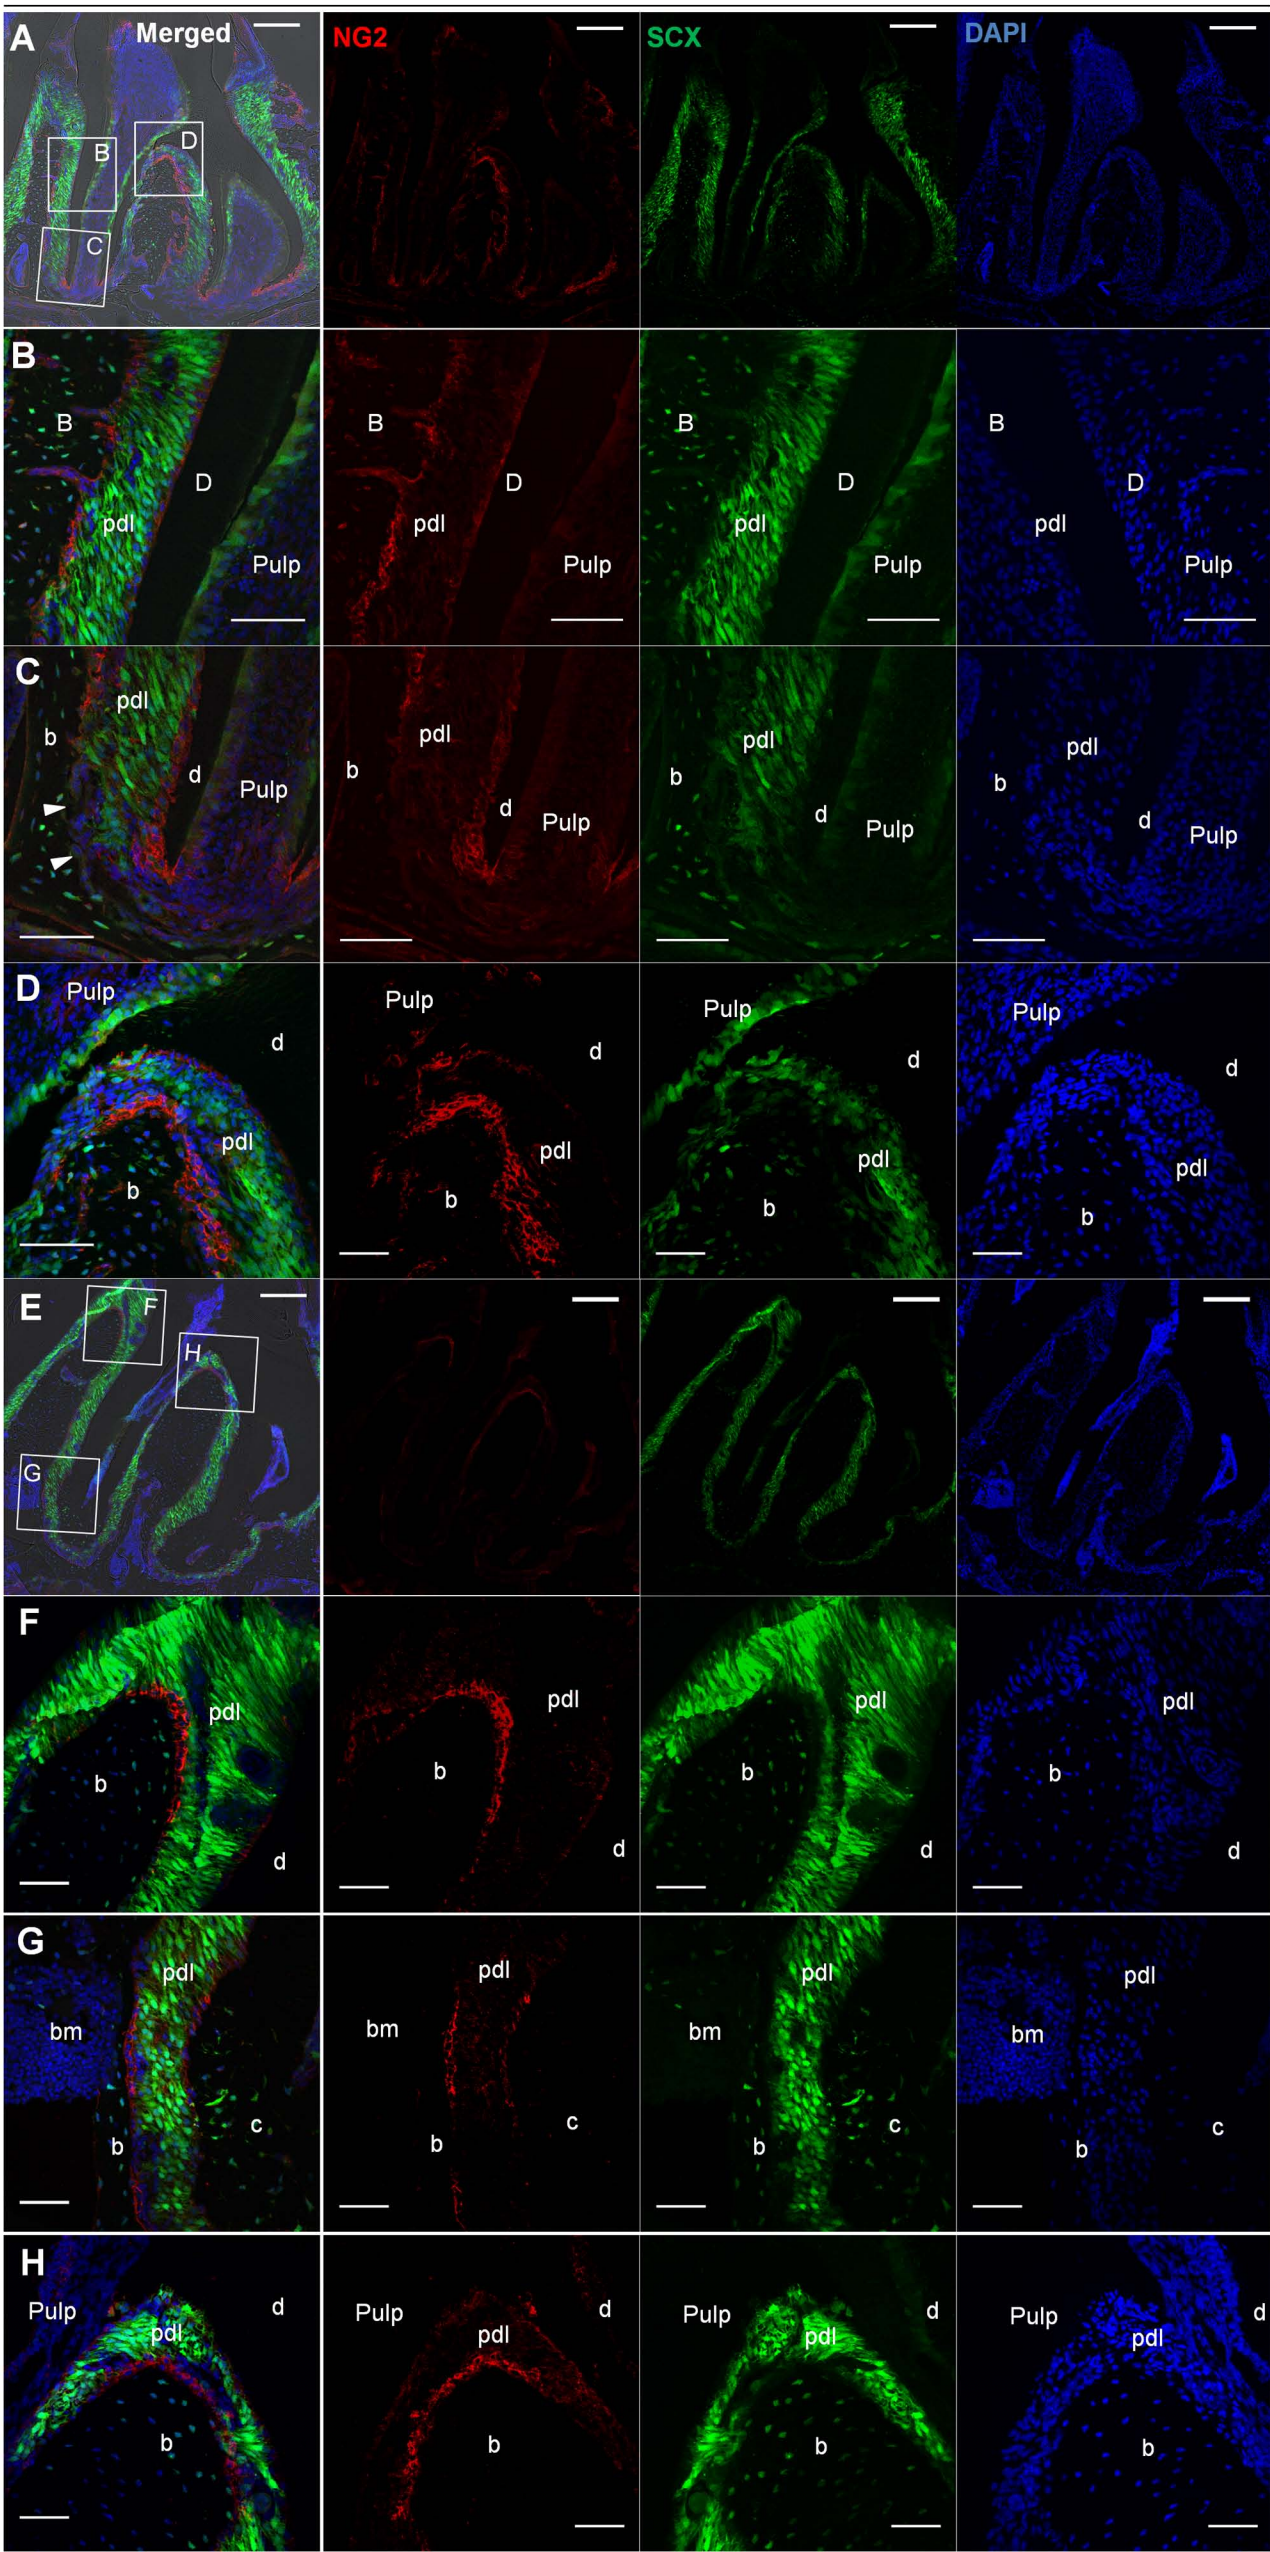



OSX/SCX/DAPI

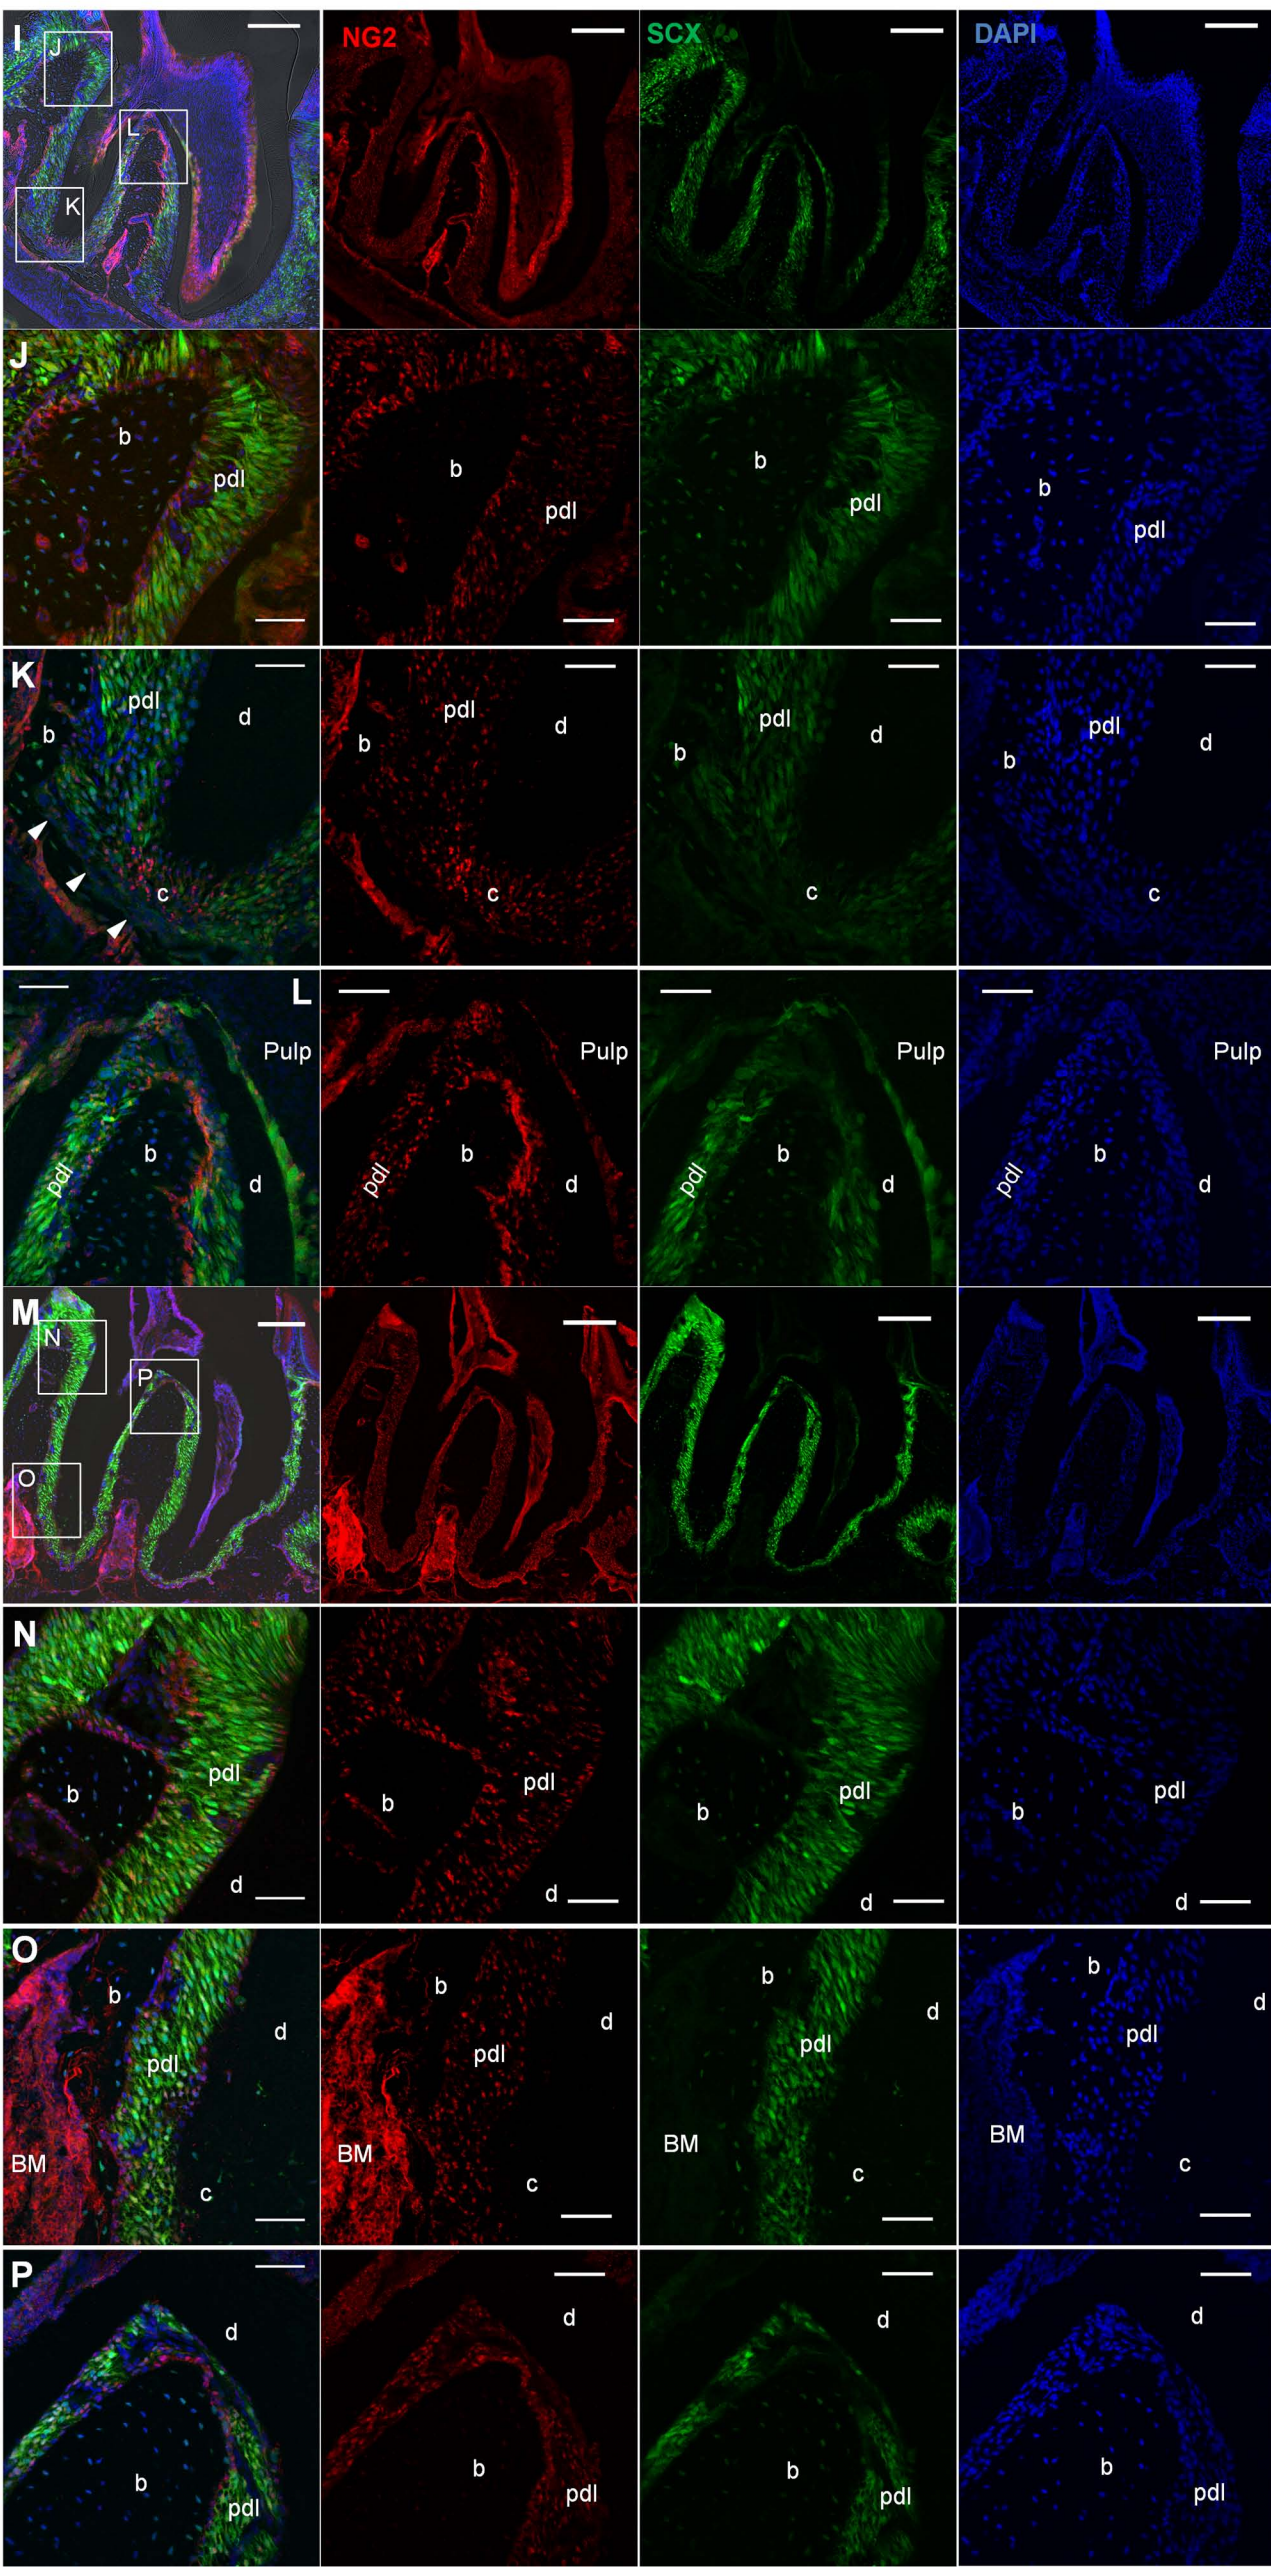

**A**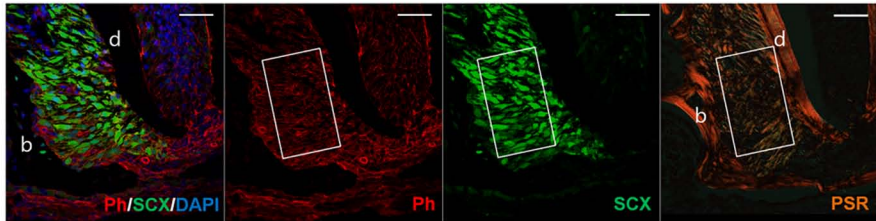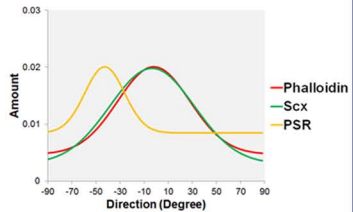**B**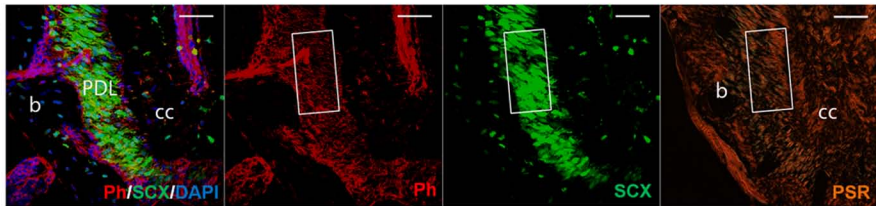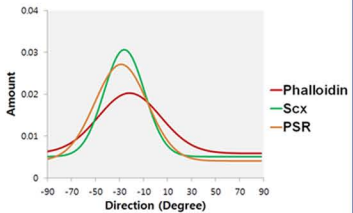



3 Weeks

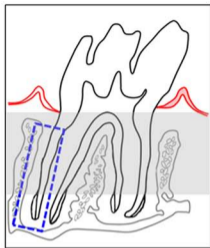

3 Months

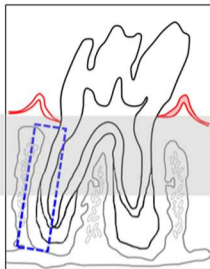

↑ Coronal (C)  
↓ Apical (A)

| B-PDL |   | C-PDL |   |
|-------|---|-------|---|
| C     | A | C     | A |
| +     | - | +     | + |
| +     | - | +     | + |
| +     | - | +     | - |
| +     | + | +     | - |
| +     | - | +     | - |

**NG2**

**Osx**

**Scx**

**BSP**

**PSR**

| B-PDL |   | C-PDL |   |
|-------|---|-------|---|
| C     | A | C     | A |
| +     | + | +     | + |
| +     | + | +     | - |
| +     | + | +     | + |
| +     | - | +     | - |
| +     | + | +     | + |

B-PDL: Bone to PDL enthesis, C-PDL: Cementum to PDL enthesis

### 3 WEEK OLD

DOMINANT PASSIVE STRETCHES DUE TO INNATE DRIFT

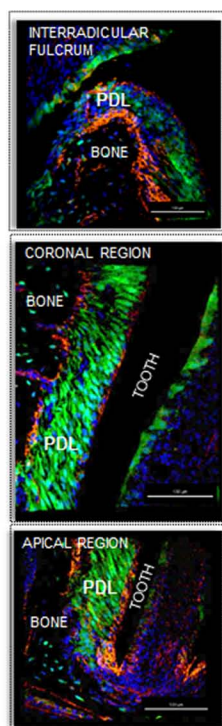

Scale bar: 50  $\mu$ m

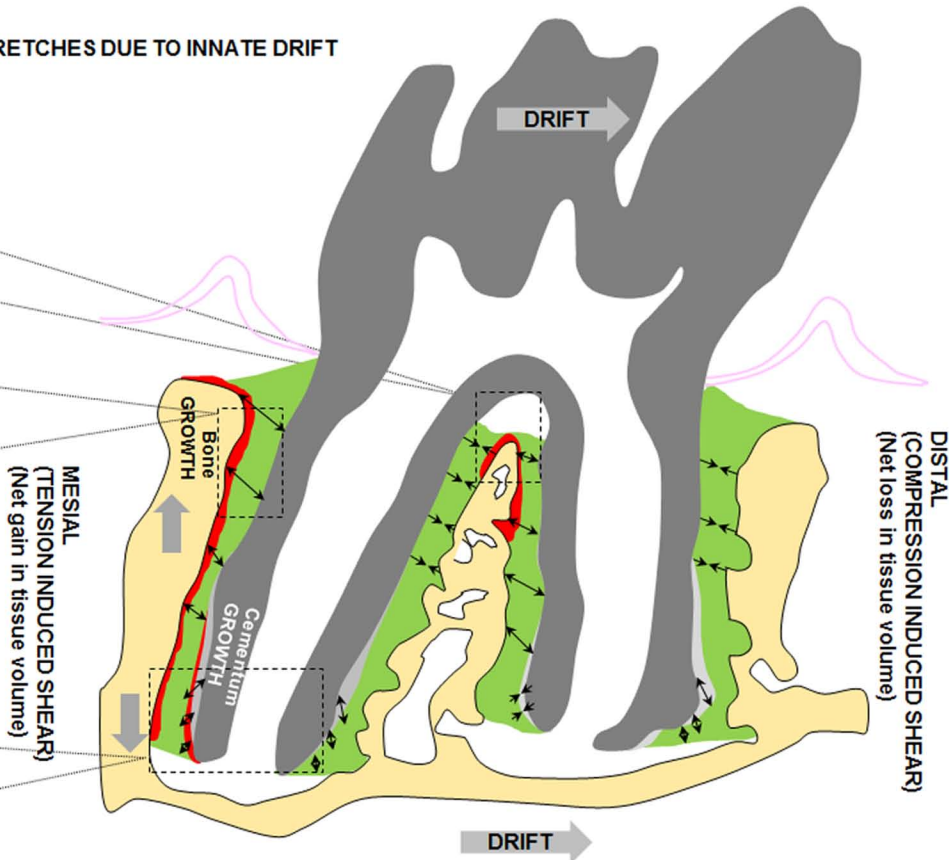

### 3 MONTH OLD

ACTIVE STRETCHES: Function-mediated moment at the interradicular bone accentuates stretches in the mesial and distal complexes

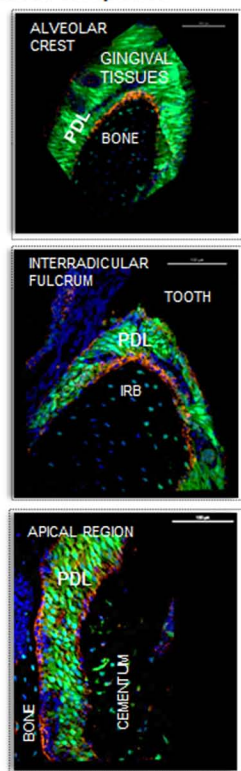

Scale bar: 50  $\mu$ m

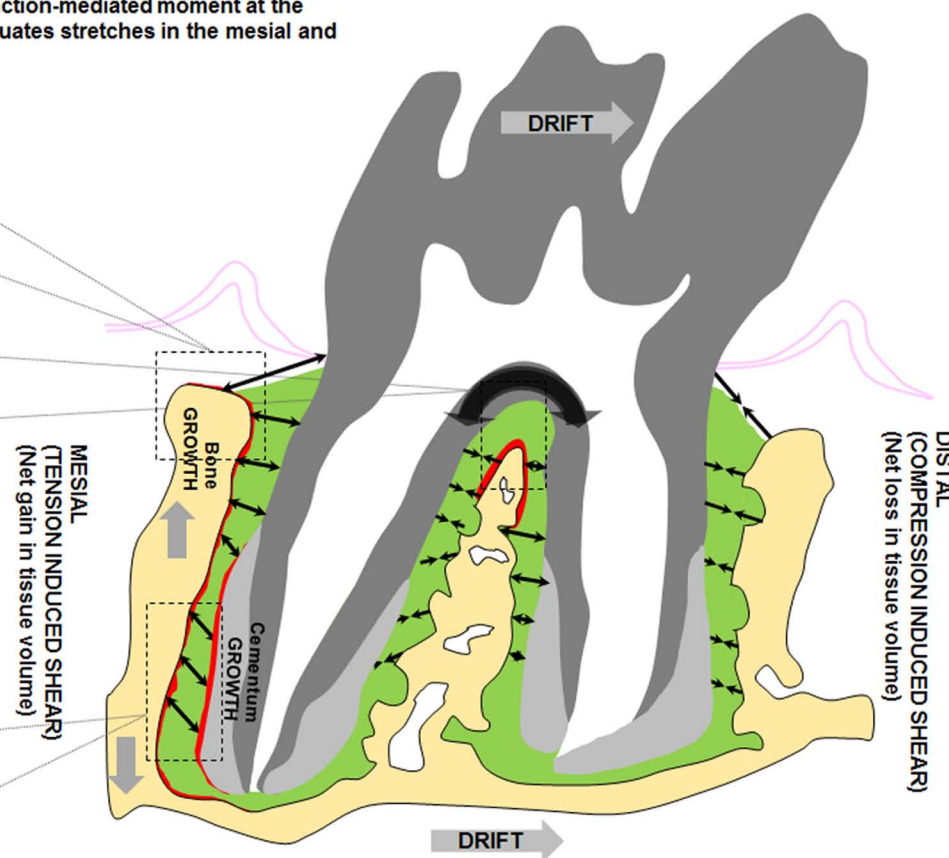

Supplement: NIHMS674678-supplement-Supp_FigureS1-S7.pdf [file NIHMS674678-supplement-Supp_FigureS1-S7.pdf]
